# Supplementary material for: Simple and highly efficient chiral dopant molecules possessing both rod- and arch-like units
Source: Royal Society of Chemistry journal article supplement (doi:10.1039/c4sm01214c), 2014-01-01
Supplement: c4sm01214c1.pdf [file c4sm01214c1.pdf]

## Simple and efficient chiral dopant molecules possessing both rod- and arch-like units

Keiki Kishikawa,\* Shota Aoyagi, Michinari Khoru, Tatsuo Taniguchi, Masahiro Takahashi and Shigeo Kohmoto

### Electric supplementary information

- (1) Phase transition behaviors of 5CB and EBBA doped with (*R*)-**1**, (*R*)-**2** and (*R*)-**3** are indicated in Tables 1S, 2S and 3S.
- (2) Polarized microphotographs (Fig. S1–S5) of blue phases of 5CB and EBBA doped with (*R*)-**1**, (*R*)-**2** and (*R*)-**3**.

**Table 1S.** Phase transition behaviours of 5CB and EBBA doped with (*R*)-**1**

| entry | mol% | LC compound | phase transition temperature (°C)    |                                                                                                     |     |
|-------|------|-------------|--------------------------------------|-----------------------------------------------------------------------------------------------------|-----|
| 1     | 1    | 5CB         | N* $\xrightleftharpoons[35.4]{35.6}$ | Iso                                                                                                 |     |
| 2     | 2    | 5CB         | N* $\xrightleftharpoons[35.8]{35.8}$ | BP <sup>a</sup> $\xrightleftharpoons[36.3]{36.3}$                                                   | Iso |
| 3     | 3    | 5CB         | N* $\xrightleftharpoons[35.7]{36.2}$ | Iso                                                                                                 |     |
| 4     | 2    | EBBA        | N* $\xrightleftharpoons[75.6]{76.4}$ | Iso                                                                                                 |     |
| 5     | 3    | EBBA        | N* $\xrightleftharpoons[75.0]{75.1}$ | BP <sup>a</sup> $\xrightleftharpoons[75.3]{75.7}$                                                   | Iso |
| 6     | 4    | EBBA        | N* $\xrightleftharpoons[74.6]{75.1}$ | BP <sup>a</sup> $\xrightleftharpoons[75.3]{75.3}$ BP <sup>b</sup> $\xrightleftharpoons[75.7]{75.7}$ | Iso |
| 7     | 5    | EBBA        | N* $\xrightleftharpoons[68.9]{69.4}$ | BP <sup>a</sup> $\xrightleftharpoons[69.3]{69.3}$                                                   | Iso |
| 8     | 6    | EBBA        | N* $\xrightleftharpoons[73.1]{73.8}$ | Iso                                                                                                 |     |

N\*: chiral nematic phase, BP: blue phase, Iso: isotropic liquid. <sup>a</sup> BP with a platelet texture. <sup>b</sup> BP with a fog texture.

**Table 2S.** Phase transition behaviours of EBBA doped with (*R*)-2

| entry | mol% | LC compound | phase transition temperature (°C) |                                   |                                                                                                                                                           |
|-------|------|-------------|-----------------------------------|-----------------------------------|-----------------------------------------------------------------------------------------------------------------------------------------------------------|
| 1     | 3    | 5CB         | N*                                | $\xrightleftharpoons[34.4]{34.5}$ | Iso                                                                                                                                                       |
| 2     | 4    | 5CB         | N*                                | $\xrightleftharpoons[34.5]{35.0}$ | BP $\xrightleftharpoons[35.0]{35.1}$ Iso                                                                                                                  |
| 3     | 5    | 5CB         | N*                                | $\xrightleftharpoons[34.5]{35.0}$ | BP $\xrightleftharpoons[35.0]{35.1}$ Iso                                                                                                                  |
| 4     | 6    | 5CB         | recrystallization of dopant       |                                   |                                                                                                                                                           |
| 5     | 3    | EBBA        | N*                                | $\xrightleftharpoons[79.9]{79.8}$ | Iso                                                                                                                                                       |
| 6     | 4    | EBBA        | N*                                | $\xrightleftharpoons[73.8]{73.9}$ | BP <sup>a</sup> $\xrightleftharpoons[74.3]{74.3}$ Iso                                                                                                     |
| 7     | 5    | EBBA        | N*                                | $\xrightleftharpoons[69.9]{70.0}$ | BP <sup>a</sup> $\xrightleftharpoons[70.8]{70.8}$ BP <sup>b</sup> $\xrightleftharpoons[70.8]{70.8}$ Iso                                                   |
| 8     | 6    | EBBA        | N*                                | $\xrightleftharpoons[72.1]{72.3}$ | BP <sup>a</sup> $\xrightleftharpoons[72.9]{72.8}$ BP <sup>a</sup> $\xrightleftharpoons[73.0]{72.9}$ BP <sup>b</sup> $\xrightleftharpoons[73.1]{73.1}$ Iso |
| 9     | 7    | EBBA        | N*                                | $\xrightleftharpoons[72.6]{73.0}$ | BP <sup>a</sup> $\xrightleftharpoons[73.7]{73.6}$ Iso                                                                                                     |
| 10    | 8    | EBBA        | N*                                | $\xrightleftharpoons[73.1]{73.3}$ | BP <sup>a</sup> $\xrightleftharpoons[74.1]{73.8}$ Iso                                                                                                     |
| 11    | 9    | EBBA        | N*                                | $\xrightleftharpoons[64.6]{65.1}$ | BP <sup>a</sup> $\xrightleftharpoons[66.5]{66.9}$ Iso                                                                                                     |
| 12    | 10   | EBBA        | recrystallization of dopant       |                                   |                                                                                                                                                           |

N\*: chiral nematic phase, BP: blue phase, Iso: isotropic liquid. <sup>a</sup> BP with a platelet texture. <sup>b</sup> BP with a fog texture.

**Table 3S.** Phase transition behaviours of 5CB and EBBA doped with (*R*)-**3**

| entry | mol% | LC compound | phase transition temperature (°C) |                                   |                                                       |
|-------|------|-------------|-----------------------------------|-----------------------------------|-------------------------------------------------------|
| 1     | 3    | 5CB         | N*                                | $\xrightleftharpoons[33.1]{33.2}$ | Iso                                                   |
| 2     | 4    | 5CB         | N*                                | $\xrightleftharpoons[32.3]{32.7}$ | BP <sup>a</sup> $\xrightleftharpoons[32.8]{32.9}$ Iso |
| 3     | 5    | 5CB         | recrystallization of dopant       |                                   |                                                       |
| 4     | 3    | EBBA        | N*                                | $\xrightleftharpoons[74.7]{74.8}$ | Iso                                                   |
| 5     | 4    | EBBA        | N*                                | $\xrightleftharpoons[75.2]{75.7}$ | BP <sup>a</sup> $\xrightleftharpoons[75.9]{76.2}$ Iso |
| 6     | 5    | EBBA        | N*                                | $\xrightleftharpoons[71.2]{71.3}$ | BP <sup>a</sup> $\xrightleftharpoons[71.9]{71.9}$ Iso |
| 7     | 6    | EBBA        | recrystallization of dopant       |                                   |                                                       |

N\*: chiral nematic phase, BP: blue phase, Iso: isotropic liquid. <sup>a</sup> BP with a platelet texture.

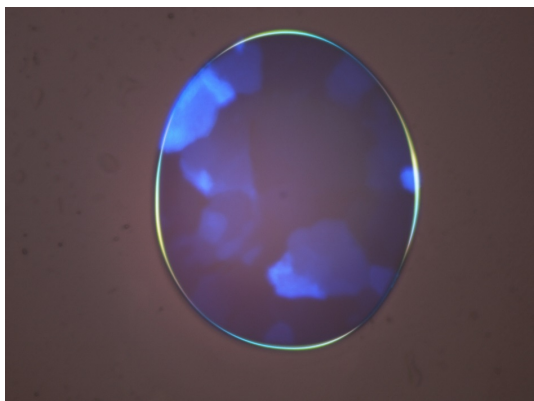

**Fig.S1** Polarized microphotograph of the blue phase of EBBA doped with 4 mol% of (*R*)-**1** (75.3°C on cooling,  $\times 200$ ).

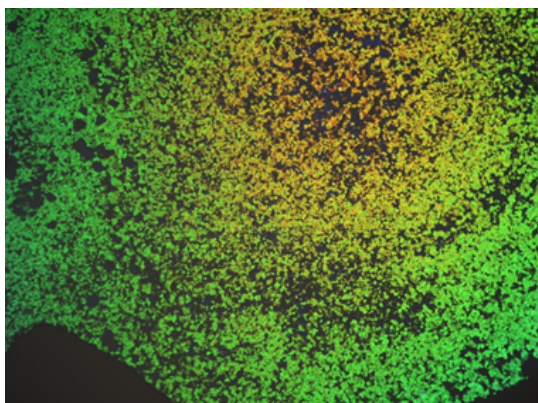

**Fig.S2** Polarized microphotograph of the blue phase of 5CB doped with 5 mol% of (*R*)-**2** (34.8°C on cooling,  $\times 100$ ).

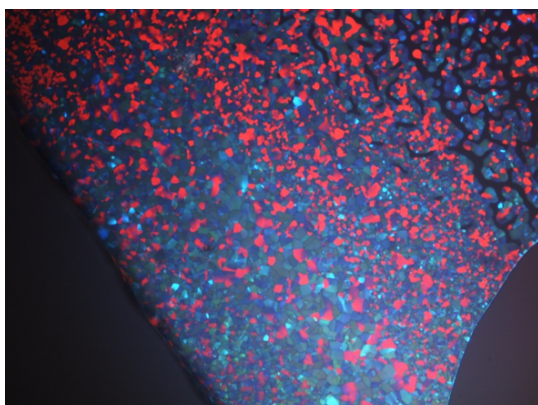

**Fig.S3** Polarized microphotograph of the blue phase of EBBA doped with 4 mol% of (*R*)-**2** (74.3°C on cooling,  $\times 100$ ).

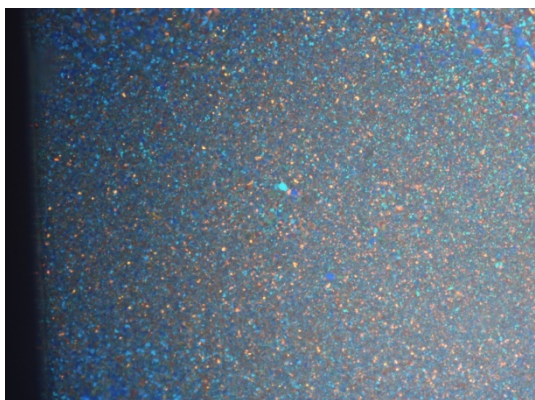

**Fig.S4** Polarized microphotograph of the blue phase of 5CB doped with 4 mol% of (*R*)-**3** (33.0°C on cooling,  $\times 100$ ).

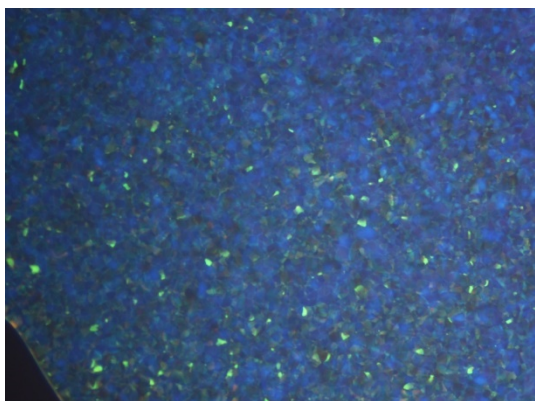

**Fig. S5** Polarized microphotograph of the blue phase of EBBA doped with 4 mol% of (*R*)-**3** (75.5°C on cooling,  $\times 200$ ).
